# Supplementary material for: Heterogeneous trends in burden of heart disease mortality by subtypes in the United States, 1999-2018: observational analysis of vital statistics
Source: PubMed Central journal article supplement — BMJ. 2020 Aug 13;370:m2688. doi: 10.1136/bmj.m2688 (PMC7424397; doi:10.1136/bmj.m2688), 2020-08-13
Supplement: shan055647.ww1.pdf [file shan055647.ww1.pdf]

**Heterogeneous Trends in Burden of Heart Disease Mortality by Subtypes in the United States, 1999-2018: Observational Analysis of Vital Statistics**

Supplementary Material

**Supplementary Table A. Number of deaths from total heart disease and heart disease subtypes in the US in 1999, 2011, and 2018**

|                                   | <b>1999</b> | <b>2011</b> | <b>2018</b> |
|-----------------------------------|-------------|-------------|-------------|
| <b>Total Heart Disease</b>        | 725,192     | 596,577     | 655,381     |
| <b>Ischemic Heart Disease</b>     | 529,659     | 375,295     | 365,744     |
| <b>Heart Failure</b>              | 54,913      | 58,309      | 83,616      |
| <b>Hypertensive Heart Disease</b> | 26,029      | 37,270      | 60,041      |
| <b>Valvular Heart Disease</b>     | 19,612      | 23,141      | 24,337      |
| <b>Arrhythmia</b>                 | 18,309      | 28,033      | 36,417      |
| <b>Pulmonary Heart Disease</b>    | 13,244      | 14,206      | 18,026      |
| <b>Other Heart Disease</b>        | 63,426      | 60,323      | 67,200      |

**Supplementary Table B. Trends in age-adjusted mortality rates from total and cause-specific heart disease deaths stratified by race-sex subgroups of all ages in the US, 1999-2018**

| Heart Disease Subtype      | Race-Sex Group | AAMR per 100,000 (95% CI) |                           |                           | Mean Annual Percent Change (95% CI) |                      |
|----------------------------|----------------|---------------------------|---------------------------|---------------------------|-------------------------------------|----------------------|
|                            |                | 1999                      | 2011                      | 2018                      | 1999-2011                           | 2011-2018            |
| Total Heart Disease        | Black women    | 283.7<br>(281.0 to 286.5) | 176.2<br>(174.3 to 178.1) | 162.2<br>(160.6 to 163.9) | -3.9 (-4.3 to -3.5)*                | -1.2 (-1.6 to -0.8)* |
|                            | White women    | 212.8<br>(212.0 to 213.5) | 136.5<br>(135.9 to 137.0) | 126.6<br>(126.1 to 127.1) | -3.8 (-4.1 to -3.6)*                | -0.9 (-1.3 to -0.4)* |
|                            | Black men      | 407.2<br>(402.8 to 411.6) | 266.1<br>(263.1 to 269.2) | 259.5<br>(256.9 to 262.1) | -3.4 (-3.6 to -3.2)*                | -0.5 (-1.0 to 0.0)   |
|                            | White men      | 327.1<br>(325.9 to 328.3) | 216.9<br>(216.0 to 217.7) | 206.3<br>(205.6 to 207.1) | -3.4 (-3.9 to -2.9)*                | -0.6 (-1.0 to -0.3)* |
| Ischemic Heart Disease     | Black women    | 188.0<br>(185.7 to 190.2) | 99.7<br>(98.3 to 101.2)   | 77.9<br>(76.8 to 79.1)    | -5.3 (-5.6 to -4.9)*                | -3.3 (-3.7 to -3.0)* |
|                            | White women    | 150.5<br>(149.9 to 151.1) | 80.1<br>(79.6 to 80.5)    | 63.7<br>(63.4 to 64.1)    | -5.1 (-5.6 to -4.6)*                | -3.3 (-3.7 to -2.9)* |
|                            | Black men      | 278.7<br>(275.1 to 282.4) | 161.5<br>(159.1 to 163.8) | 138.1<br>(136.2 to 139.9) | -4.4 (-4.7 to -4.1)*                | -2.3 (-2.9 to -1.7)* |
|                            | White men      | 251.2<br>(250.2 to 252.2) | 146.5<br>(145.8 to 147.2) | 125.6<br>(125.0 to 126.2) | -4.4 (-4.8 to -3.9)*                | -2.2 (-2.6 to -1.9)* |
| Heart Failure              | Black women    | 20.9 (20.1 to 21.6)       | 17.0 (16.4 to 17.6)       | 21.5 (20.9 to 22.1)       | -1.6 (-2.5 to -0.7)*                | 3.5 (2.8 to 4.2)*    |
|                            | White women    | 19.3 (19.1 to 19.5)       | 15.8 (15.6 to 15.9)       | 18.7 (18.5 to 18.9)       | -1.7 (-2.5 to -0.9)*                | 2.6 (2.1 to 3.2)*    |
|                            | Black men      | 25.3 (24.1 to 26.4)       | 20.7 (19.8 to 21.6)       | 28.9 (28.0 to 29.8)       | -1.3 (-2.2 to -0.4)*                | 4.9 (4.0 to 5.8)*    |
|                            | White men      | 21.4 (21.1 to 21.7)       | 18.8 (18.5 to 19.0)       | 23.8 (23.6 to 24.1)       | -1.3 (-1.7 to -0.9)*                | 3.8 (2.8 to 4.8)*    |
| Hypertensive Heart Disease | Black women    | 24.4 (23.6 to 25.2)       | 20.2 (19.6 to 20.9)       | 22.3 (21.7 to 22.9)       | -1.4 (-1.8 to -1.0)*                | 0.7 (-1.0 to 2.3)    |
|                            | White women    | 7.4 (7.3 to 7.6)          | 8.1 (8.0 to 8.2)          | 11.8 (11.6 to 11.9)       | 0.9 (0.5 to 1.3)*                   | 5.6 (4.3 to 7.0)*    |
|                            | Black men      | 30.2 (29.1 to 31.4)       | 29.7 (28.7 to 30.6)       | 35.3 (34.4 to 36.3)       | 0.3 (-0.5 to 1.1)                   | 1.8 (0.9 to 2.6)*    |
|                            | White men      | 7.8 (7.6 to 8.0)          | 10.4 (10.2 to 10.5)       | 15.7 (15.5 to 15.9)       | 2.5 (2.0 to 3.0)*                   | 6.3 (4.9 to 9.4)*    |
| Valvular Heart Disease     | Black women    | 5.1 (4.8 to 5.5)          | 4.0 (3.7 to 4.3)          | 3.8 (3.5 to 4.1)          | -1.8 (-2.1 to -1.5)*                | -1.8 (-2.1 to -1.5)* |
|                            | White women    | 7.1 (7.0 to 7.2)          | 6.7 (6.6 to 6.8)          | 6.1 (6.0 to 6.2)          | -0.4 (-0.6 to -0.2)*                | -1.5 (-2.5 to -0.4)* |
|                            | Black men      | 5.4 (4.9 to 5.9)          | 4.2 (3.8 to 4.6)          | 4.2 (3.8 to 4.5)          | -1.5 (-2.0 to -0.9)*                | -1.5 (-2.0 to -0.9)* |
|                            | White men      | 7.8 (7.6 to 8.0)          | 7.6 (7.5 to 7.8)          | 6.9 (6.7 to 7.0)          | 0.1 (-0.2 to 0.4)                   | -1.6 (-3.1 to 0.0)   |
| Arrhythmia                 | Black women    | 6.5 (6.1 to 6.9)          | 6.5 (6.2 to 6.9)          | 7.0 (6.7 to 7.4)          | 0.4 (-1.4 to 2.3)                   | 0.9 (-0.1 to 1.9)    |
|                            | White women    | 6.2 (6.1 to 6.3)          | 8.1 (8.0 to 8.3)          | 8.8 (8.7 to 9.0)          | 2.0 (1.7 to 2.3)*                   | 2.0 (1.7 to 2.3)*    |
|                            | Black men      | 8.9 (8.2 to 9.6)          | 8.2 (7.7 to 8.8)          | 9.3 (8.8 to 9.8)          | 0.1 (-0.3 to 0.5)                   | 0.1 (-0.3 to 0.5)    |
|                            | White men      | 7.4 (7.2 to 7.5)          | 8.5 (8.3 to 8.7)          | 10.1 (9.9 to 10.2)        | 1.0 (0.5 to 1.6)*                   | 2.7 (2.3 to 3.2)*    |
| Pulmonary Heart Disease    | Black women    | 8.9 (8.4 to 9.4)          | 7.0 (6.6 to 7.4)          | 8.3 (7.9 to 8.7)          | -1.5 (-2.2 to -0.8)*                | 1.1 (0.4 to 1.8)*    |
|                            | White women    | 4.6 (4.5 to 4.7)          | 4.3 (4.2 to 4.4)          | 4.6 (4.5 to 4.7)          | -0.7 (-1.5 to -0.2)*                | 1.4 (1.1 to 1.8)*    |
|                            | Black men      | 8.4 (7.8 to 9.0)          | 6.4 (6.0 to 6.9)          | 7.3 (6.9 to 7.7)          | -2.1 (-3.0 to -1.2)*                | 1.3 (0.2 to 2.4)*    |
|                            | White men      | 4.5 (4.3 to 4.6)          | 3.7 (3.6 to 3.8)          | 4.1 (4.0 to 4.2)          | -1.8 (-2.5 to -1.0)*                | 2.1 (1.1 to 3.0)*    |
| Other Heart Disease        | Black women    | 29.9 (29.1 to 30.8)       | 21.7 (21.0 to 22.3)       | 21.3 (20.7 to 21.9)       | -2.4 (-2.7 to -2.1)*                | -0.7 (-1.5 to 0.1)   |
|                            | White women    | 17.6 (17.4 to 17.9)       | 13.4 (13.2 to 13.6)       | 12.8 (12.6 to 13.0)       | -2.2 (-2.7 to -1.7)*                | -0.6 (-2.6 to 1.6)   |
|                            | Black men      | 50.2 (48.8 to 51.7)       | 35.4 (34.3 to 36.5)       | 36.4 (35.5 to 37.4)       | -2.5 (-2.9 to -2.2)*                | 0.1 (-0.8 to 0.9)    |
|                            | White men      | 27.1 (26.8 to 27.4)       | 21.4 (21.1 to 21.7)       | 20.2 (20.0 to 20.4)       | -1.8 (-2.2 to -1.4)*                | -0.7 (-1.0 to -0.4)* |

CI: Confidence interval. AAMR: Age-adjusted mortality rate per 100,000 population. Mean annual percentage change shown for AAMR for the specified time range. \*Indicates that the mean annual percent change is significantly different from zero, p<0.05.

**Supplementary Table C. Trends in age-adjusted mortality rates from total and cause-specific heart disease deaths stratified by race-sex subgroups in decedents <45 years in the US, 1999-2018**

| Heart Disease Subtype             |                    | AAMR per 100,000 |      |      | Mean Annual Percent Change (95% CI) |                      |
|-----------------------------------|--------------------|------------------|------|------|-------------------------------------|----------------------|
|                                   |                    | 1999             | 2011 | 2018 | 1999-2011                           | 2011-2018            |
| <b>Total Heart Disease</b>        | <b>Black women</b> | 15.6             | 12.2 | 12.1 | -2.2 (-2.7 to -1.8)*                | 0.0 (-1.2 to 1.3)    |
|                                   | <b>White women</b> | 5.2              | 4.9  | 4.9  | -0.7 (-1.2 to -0.3)*                | 0.5 (-0.3 to 1.3)    |
|                                   | <b>Black men</b>   | 27.4             | 22.6 | 23.4 | -1.0 (-1.2 to -0.7)*                | -1.0 (-1.2 to -0.7)* |
|                                   | <b>White men</b>   | 12.5             | 11.1 | 10.2 | -1.0 (-1.5 to -0.4)*                | -0.9 (-1.6 to -0.1)* |
| <b>Ischemic Heart Disease</b>     | <b>Black women</b> | 4.9              | 3.2  | 3.0  | -2.8 (-3.3 to -2.3)*                | -2.8 (-3.3 to -2.3)* |
|                                   | <b>White women</b> | 2.0              | 1.7  | 1.5  | -0.8 (-2.1 to 0.4)                  | -2.2 (-4.6 to 0.2)   |
|                                   | <b>Black men</b>   | 11.3             | 8.4  | 7.8  | -2.0 (-2.3 to -1.7)*                | -2.0 (-2.3 to -1.7)* |
|                                   | <b>White men</b>   | 7.2              | 5.6  | 4.4  | -2.1 (-2.6 to -1.5)*                | -3.2 (-3.4 to -3.0)* |
| <b>Heart Failure</b>              | <b>Black women</b> | 0.5              | 0.7  | 0.8  | 2.1 (-5.0 to 9.6)                   | 1.7 (-1.9 to 5.5)    |
|                                   | <b>White women</b> | 0.1              | 0.1  | 0.2  | 0.2 (-2.8 to 3.2)                   | 0.2 (-2.8 to 3.2)    |
|                                   | <b>Black men</b>   | 0.7              | 1.0  | 1.7  | 2.8 (0.0 to 5.6)*                   | 8.8 (5.7 to 12.0)*   |
|                                   | <b>White men</b>   | 0.2              | 0.2  | 0.4  | 2.8 (1.4 to 4.2)*                   | 2.8 (1.4 to 4.2)*    |
| <b>Hypertensive Heart Disease</b> | <b>Black women</b> | 2.2              | 2.6  | 2.6  | 0.6 (0.1 to 1.1)*                   | 0.6 (0.1 to 1.1)*    |
|                                   | <b>White women</b> | 0.2              | 0.4  | 0.6  | 4.7 (3.6 to 5.8)*                   | 4.7 (3.6 to 5.8)*    |
|                                   | <b>Black men</b>   | 3.6              | 4.6  | 5.1  | 1.8 (1.3 to 2.3)*                   | 1.8 (1.3 to 2.3)*    |
|                                   | <b>White men</b>   | 0.7              | 1.2  | 1.5  | 5.2 (3.7 to 6.7)*                   | 2.7 (2.0 to 3.3)*    |
| <b>Valvular Heart Disease</b>     | <b>Black women</b> | 0.5              | 0.4  | 0.3  | -4.5 (-6.1 to -2.8)*                | -4.5 (-6.1 to -2.8)* |
|                                   | <b>White women</b> | 0.3              | 0.2  | 0.2  | -0.2 (-1.9 to 1.5)                  | -0.2 (-1.9 to 1.5)   |
|                                   | <b>Black men</b>   | 0.6              | 0.3  | 0.5  | -4.1 (-5.6 to -2.5)*                | 3.6 (-4.9 to 12.8)   |
|                                   | <b>White men</b>   | 0.3              | 0.3  | 0.3  | -0.1 (-0.1 to -0.1)*                | 0.8 (0.8 to 0.8)*    |
| <b>Arrhythmia</b>                 | <b>Black women</b> | 0.6              | 0.4  | 0.4  | -1.6 (-2.8 to -0.4)*                | -1.6 (-2.8 to -0.4)* |
|                                   | <b>White women</b> | 0.3              | 0.3  | 0.3  | -0.4 (-1.6 to 0.8)                  | -0.4 (-1.6 to 0.8)   |
|                                   | <b>Black men</b>   | 0.8              | 0.9  | 0.8  | 0.2 (-0.6 to 1.1)                   | 0.2 (-0.6 to 1.1)    |
|                                   | <b>White men</b>   | 0.4              | 0.4  | 0.4  | -0.5 (-4.6 to 3.9)                  | 0.1 (-1.1 to 1.3)    |
| <b>Pulmonary Heart Disease</b>    | <b>Black women</b> | 2.2              | 1.7  | 1.8  | -1.0 (-1.6 to -0.3)*                | -1.0 (-1.6 to -0.3)* |
|                                   | <b>White women</b> | 0.8              | 0.7  | 0.7  | -2.1 (-3.6 to -0.7)*                | 0.5 (-1.2 to 2.3)    |
|                                   | <b>Black men</b>   | 1.5              | 1.3  | 1.4  | -0.8 (-1.8 to 0.2)                  | -0.8 (-1.8 to 0.2)   |
|                                   | <b>White men</b>   | 0.7              | 0.5  | 0.6  | -1.7 (-2.7 to -0.8)*                | 3.2 (1.3 to 5.1)*    |
| <b>Other Heart Disease</b>        | <b>Black women</b> | 4.7              | 3.3  | 3.2  | -3.1 (-3.7 to -2.5)*                | -0.7 (-2.2 to 0.9)   |
|                                   | <b>White women</b> | 1.5              | 1.4  | 1.4  | 0.1 (-0.5 to 0.3)                   | 0.1 (-0.5 to 0.3)    |
|                                   | <b>Black men</b>   | 8.8              | 6.0  | 6.1  | -2.6 (-5.1 to 0.0)*                 | -0.4 (-0.4 to 1.2)   |
|                                   | <b>White men</b>   | 3.0              | 2.9  | 2.6  | -0.8 (-1.0 to -0.5)*                | -0.8 (-1.0 to -0.5)* |

CI: Confidence interval. AAMR: Age-adjusted mortality rate per 100,000 population. Mean annual percentage change shown for AAMR for the specified time range. Total includes all decedents of all race/ethnicity groups. \*Indicates that the mean annual percent change is significantly different from zero,  $p < 0.05$ .

**Supplementary Table D. Trends in age-adjusted mortality rates from total and cause-specific heart disease deaths stratified by race-sex subgroups in decedents 45-64 years in the US, 1999-2018**

| Heart Disease Subtype             | AAMR per 100,000   |       |       | Mean Annual Percent Change (95% CI) |                      |                      |
|-----------------------------------|--------------------|-------|-------|-------------------------------------|----------------------|----------------------|
|                                   | 1999               | 2011  | 2018  | 1999-2011                           | 2011-2018            |                      |
| <b>Total Heart Disease</b>        | <b>Black women</b> | 209.1 | 137.8 | 140.9                               | -3.4 (-4.2 to -2.6)* | 0.3 (-0.4 to 1.0)    |
|                                   | <b>White women</b> | 83.7  | 63.1  | 64.5                                | -2.2 (-2.5 to -2.0)* | 0.5 (0.1 to 0.9)*    |
|                                   | <b>Black men</b>   | 414.1 | 278.8 | 288.1                               | -3.3 (-3.6 to -3.1)* | 0.3 (-0.3 to 0.9)    |
|                                   | <b>White men</b>   | 222.2 | 166.2 | 165.3                               | -2.4 (-2.7 to -2.1)* | -0.1 (-0.4 to 0.2)   |
| <b>Ischemic Heart Disease</b>     | <b>Black women</b> | 124.6 | 70.3  | 63.9                                | -4.9 (-5.6 to -4.1)* | -1.2 (-1.8 to -0.6)* |
|                                   | <b>White women</b> | 57.7  | 37.9  | 35.6                                | -3.3 (-3.5 to -3.0)* | -0.8 (-1.2 to -0.3)* |
|                                   | <b>Black men</b>   | 273.2 | 160.4 | 149.7                               | -4.2 (-4.6 to -3.8)* | -1.1 (-1.6 to -0.5)* |
|                                   | <b>White men</b>   | 176.0 | 118.3 | 108.3                               | -3.2 (-3.4 to -3.0)* | -1.4 (-1.7 to -1.2)* |
| <b>Heart Failure</b>              | <b>Black women</b> | 9.0   | 7.9   | 12.3                                | -1.2 (-3.0 to 0.6)   | 7.0 (5.1 to 8.9)*    |
|                                   | <b>White women</b> | 3.2   | 3.0   | 4.0                                 | -1.5 (-2.2 to -0.7)* | 4.5 (2.7 to 6.4)*    |
|                                   | <b>Black men</b>   | 14.1  | 13.4  | 21.0                                | 0.4 (-1.1 to 2.0)    | 6.5 (4.9 to 8.2)*    |
|                                   | <b>White men</b>   | 5.1   | 4.8   | 7.3                                 | -0.6 (-1.3 to 0.1)   | 5.8 (4.2 to 7.5)*    |
| <b>Hypertensive Heart Disease</b> | <b>Black women</b> | 24.7  | 23.5  | 26.1                                | 0.0 (-1.4 to 0.5)    | 0.0 (-1.4 to 0.5)    |
|                                   | <b>White women</b> | 3.5   | 5.5   | 7.2                                 | 4.1 (3.7 to 4.5)*    | 4.1 (3.7 to 4.5)*    |
|                                   | <b>Black men</b>   | 41.0  | 45.8  | 51.4                                | 1.3 (-0.4 to 2.9)    | 1.0 (0.4 to 1.6)*    |
|                                   | <b>White men</b>   | 7.3   | 13.6  | 17.6                                | 5.6 (4.9 to 6.3)*    | 3.6 (3.3 to 3.9)*    |
| <b>Valvular Heart Disease</b>     | <b>Black women</b> | 4.1   | 2.7   | 1.7                                 | -2.4 (-3.1 to -1.6)* | -2.4 (-3.1 to -1.6)* |
|                                   | <b>White women</b> | 1.9   | 1.5   | 1.6                                 | -1.6 (-2.2 to -1.1)* | 0.7 (-0.6 to 1.9)    |
|                                   | <b>Black men</b>   | 5.2   | 3.7   | 4.0                                 | -2.4 (-3.2 to -1.6)* | -2.4 (-3.2 to -1.6)* |
|                                   | <b>White men</b>   | 2.7   | 2.7   | 2.7                                 | 0.1 (-0.3 to 0.6)    | 0.1 (-0.3 to 0.6)    |
| <b>Arrhythmia</b>                 | <b>Black women</b> | 4.5   | 4.1   | 4.6                                 | -0.1 (-0.7 to 0.6)   | -0.1 (-0.7 to 0.6)   |
|                                   | <b>White women</b> | 2.1   | 2.5   | 2.5                                 | 1.2 (0.7 to 1.7)*    | 1.2 (0.7 to 1.7)*    |
|                                   | <b>Black men</b>   | 7.9   | 6.7   | 8.4                                 | -1.8 (-2.9 to -0.7)* | 3.2 (1.5 to 5.0)*    |
|                                   | <b>White men</b>   | 3.9   | 4.1   | 5.1                                 | 0.5 (-0.3 to 1.3)    | 3.4 (2.6 to 4.1)*    |
| <b>Pulmonary Heart Disease</b>    | <b>Black women</b> | 11.3  | 8.4   | 8.7                                 | -2.0 (-3.0 to -0.9)* | 0.8 (-0.3 to 1.8)    |
|                                   | <b>White women</b> | 4.2   | 3.6   | 3.7                                 | -2.1 (-2.8 to -1.4)* | 1.6 (-0.3 to 3.6)    |
|                                   | <b>Black men</b>   | 9.9   | 8.1   | 8.3                                 | -2.1 (-3.1 to -1.2)* | 1.9 (0.7 to 3.1)*    |
|                                   | <b>White men</b>   | 4.4   | 3.8   | 4.1                                 | -1.4 (-2.2 to -0.6)* | 1.9 (1.1 to 2.7)*    |
| <b>Other Heart Disease</b>        | <b>Black women</b> | 31.2  | 21.1  | 22.7                                | -2.7 (-3.2 to -2.1)* | 0.5 (-0.9 to 1.9)    |
|                                   | <b>White women</b> | 11.2  | 9.2   | 9.6                                 | -1.3 (-1.8 to -0.8)* | 1.0 (0.5 to 1.5)*    |
|                                   | <b>Black men</b>   | 63.5  | 41.2  | 45.2                                | -3.0 (-3.4 to -2.6)* | 1.0 (0.0 to 2.0)*    |
|                                   | <b>White men</b>   | 23.1  | 19.1  | 20.1                                | -1.3 (-1.7 to -0.9)* | 0.4 (0.0 to 0.7)*    |

CI: Confidence interval. AAMR: Age-adjusted mortality rate per 100,000 population. Mean annual percentage change shown for AAMR for the specified time range. \*Indicates that the mean annual percent change is significantly different from zero,  $p < 0.05$ .

**Supplementary Table E. Trends in age-adjusted mortality rates from total and cause-specific heart disease deaths stratified by race-sex subgroups in decedents ≥65 years in the US, 1999-2018**

| Heart Disease Subtype      |             | AAMR per 100,000 |        |        | Mean Annual Percent Change (95% CI) |                      |
|----------------------------|-------------|------------------|--------|--------|-------------------------------------|----------------------|
|                            |             | 1999             | 2011   | 2018   | 1999-2011                           | 2011-2018            |
| Total Heart Disease        | Black women | 1797.1           | 1089.0 | 973.7  | -4.1 (-4.5 to -3.7)*                | -1.6 (-2.0 to -1.2)* |
|                            | White women | 1509.8           | 943.7  | 863.1  | -4.1 (-4.3 to -3.8)*                | -1.1 (-1.7 to -0.6)* |
|                            | Black men   | 2353.2           | 1499.5 | 1426.5 | -3.6 (-3.9 to -3.4)*                | -0.9 (-1.2 to -0.6)* |
|                            | White men   | 2133.2           | 1366.5 | 1289.3 | -4.2 (-4.2 to -3.1)*                | -0.8 (-1.1 to -0.4)* |
| Ischemic Heart Disease     | Black women | 1243.0           | 649.2  | 489.0  | -5.2 (-5.6 to -4.9)*                | -4.0 (-4.5 to -3.5)* |
|                            | White women | 1079.3           | 558.0  | 434.1  | -5.5 (-5.9 to -5.0)*                | -3.4 (-3.9 to -2.9)* |
|                            | Black men   | 1667.2           | 952.4  | 789.1  | -4.7 (-5.1 to -4.2)*                | -2.7 (-3.2 to -2.3)* |
|                            | White men   | 1641.3           | 922.5  | 780.7  | -4.7 (-5.2 to -4.2)*                | -2.4 (-2.8 to -2.0)* |
| Heart Failure              | Black women | 146.6            | 117.3  | 144.3  | -1.8 (-2.7 to -0.8)*                | 3.2 (2.4 to 4.0)*    |
|                            | White women | 146.3            | 118.7  | 140.0  | -1.8 (-2.6 to -0.9)*                | 2.6 (2.0 to 3.1)*    |
|                            | Black men   | 171.7            | 135.2  | 183.1  | -1.7 (-2.2 to -1.3)*                | 4.1 (3.1 to 5.2)*    |
|                            | White men   | 159.0            | 139.1  | 173.6  | -1.3 (-1.8 to -0.9)*                | 3.6 (2.6 to 4.7)*    |
| Hypertensive Heart Disease | Black women | 138.5            | 105.7  | 117.6  | -2.0 (-2.4 to -1.6)*                | 0.6 (-1.0 to 2.3)    |
|                            | White women | 51.6             | 52.2   | 77.8   | 0.3 (0.0 to 0.6)                    | 5.8 (4.3 to 7.3)*    |
|                            | Black men   | 148.5            | 130.4  | 162.9  | -0.6 (-2.4 to 1.2)                  | 2.5 (1.4 to 3.6)*    |
|                            | White men   | 45.3             | 51.8   | 85.1   | 1.2 (0.6 to 1.9)*                   | 7.4 (5.7 to 9.1)*    |
| Valvular Heart Disease     | Black women | 30.7             | 24.8   | 24.3   | -1.5 (-1.9 to -1.2)*                | -1.5 (-1.9 to -1.2)* |
|                            | White women | 51.5             | 49.2   | 44.1   | -0.3 (-0.5 to 0.1)*                 | -1.7 (-2.9 to -0.5)* |
|                            | Black men   | 30.6             | 25.0   | 23.7   | -1.1 (-1.7 to -0.4)*                | -1.1 (-1.7 to -0.4)* |
|                            | White men   | 55.3             | 54.1   | 47.8   | 0.1 (-0.2 to 0.5)                   | -1.9 (-3.6 to -0.1)* |
| Arrhythmia                 | Black women | 40.1             | 42.2   | 45.5   | 0.7 (-1.3 to 2.6)                   | 1.0 (-0.1 to 2.0)    |
|                            | White women | 44.0             | 58.7   | 64.1   | 2.1 (1.8 to 2.4)*                   | 2.1 (1.8 to 2.4)*    |
|                            | Black men   | 52.5             | 48.5   | 54.4   | 0.1 (-0.4 to 0.6)                   | 0.1 (-0.4 to 0.6)    |
|                            | White men   | 49.2             | 57.8   | 68.9   | 1.2 (0.6 to 1.8)*                   | 2.8 (2.3 to 3.3)*    |
| Pulmonary Heart Disease    | Black women | 42.4             | 33.5   | 40.9   | -1.3 (-2.1 to -0.5)*                | 2.2 (0.7 to 3.8)*    |
|                            | White women | 25.9             | 25.3   | 26.2   | 0.0 (-1.3 to 1.3)                   | 1.5 (1.2 to 1.8)*    |
|                            | Black men   | 45.1             | 32.6   | 35.9   | -2.1 (-3.4 to -0.9)*                | 0.9 (-0.6 to 2.5)    |
|                            | White men   | 26.6             | 21.7   | 22.3   | -1.8 (-2.7 to -0.9)*                | 2.1 (1.0 to 3.2)*    |
| Other Heart Disease        | Black women | 157.7            | 117.3  | 112.1  | -2.3 (-2.6 to -1.9)*                | -1.1 (-1.9 to -0.3)* |
|                            | White women | 112.3            | 82.6   | 76.9   | -2.5 (-3.0 to -1.9)*                | -1.0 (-3.2 to 1.1)   |
|                            | Black men   | 240.5            | 176.8  | 177.3  | -2.4 (-2.8 to -1.9)*                | -0.1 (-1.2 to 1.0)   |
|                            | White men   | 158.5            | 120.9  | 111.0  | -2.1 (-2.6 to -1.6)*                | -1.0 (-1.4 to -0.6)* |

CI: Confidence interval. AAMR: Age-adjusted mortality rate per 100,000 population. Mean annual percentage change shown for AAMR for the specified time range. \*Indicates that the mean annual percent change is significantly different from zero,  $p < 0.05$ .

**Supplementary Table F. Trends in age-adjusted mortality rates from total and cause-specific heart disease deaths stratified by race-sex subgroups in decedents 65-84 years in the US, 1999-2018**

| Heart Disease Subtype      | AAMR per 100,000 |        |        | Mean Annual Percent Change (95% CI) |                      |                      |
|----------------------------|------------------|--------|--------|-------------------------------------|----------------------|----------------------|
|                            | 1999             | 2011   | 2018   | 1999-2011                           | 2011-2018            |                      |
| Total Heart Disease        | Total            | 1166.1 | 696.5  | 641.5                               | -4.3 (-4.7 to -3.8)* | -1.0 (-1.3 to -0.8)* |
|                            | Black women      | 1300.3 | 743.4  | 675.7                               | -4.8 (-5.0 to -4.6)* | -1.4 (-1.9 to -0.8)* |
|                            | White women      | 889.4  | 524.8  | 466.5                               | -4.5 (-4.7 to -4.3)* | -1.4 (-1.9 to -0.9)* |
|                            | Black men        | 1862.9 | 1171.2 | 1144.1                              | -3.8 (-4.0 to -3.6)* | -0.7 (-1.2 to -0.1)* |
|                            | White men        | 1498.8 | 892.6  | 833.2                               | -4.2 (-4.5 to -3.8)* | -0.9 (-1.2 to -0.7)* |
| Ischemic Heart Disease     | Total            | 879.6  | 459.2  | 381.0                               | -5.3 (-5.7 to -4.9)* | -2.7 (-2.9 to -2.4)* |
|                            | Black women      | 898.9  | 444.5  | 343.9                               | -5.8 (-6.5 to -5.0)* | -3.5 (-4.1 to -3.0)* |
|                            | White women      | 646.9  | 321.1  | 252.4                               | -5.7 (-6.1 to -5.2)* | -3.5 (-3.9 to -3.2)* |
|                            | Black men        | 1329.7 | 746.8  | 644.2                               | -4.8 (-5.5 to -4.2)* | -2.2 (-2.8 to -1.5)* |
|                            | White men        | 1180.7 | 626.5  | 533.8                               | -5.1 (-5.5 to -4.7)* | -2.2 (-2.5 to -1.9)* |
| Heart Failure              | Total            | 76.6   | 61.6   | 74.0                                | -2.0 (-2.7 to -1.3)* | 3.0 (1.2 to 4.8)*    |
|                            | Black women      | 92.4   | 69.6   | 88.0                                | -2.4 (-3.1 to -1.7)* | 4.0 (2.3 to 5.7)*    |
|                            | White women      | 67.9   | 54.0   | 60.7                                | -2.0 (-2.9 to -1.0)* | 2.1 (1.5 to 2.8)*    |
|                            | Black men        | 111.3  | 91.8   | 128.2                               | -1.3 (-1.8 to -0.8)* | 4.4 (3.2 to 5.6)*    |
|                            | White men        | 86.1   | 71.0   | 88.6                                | -1.7 (-2.1 to -1.3)* | 3.6 (2.6 to 4.6)*    |
| Hypertensive Heart Disease | Total            | 35.8   | 34.4   | 49.0                                | -0.2 (-0.7 to 0.4)   | 4.8 (4.2 to 5.5)*    |
|                            | Black women      | 103.5  | 72.1   | 79.1                                | -2.6 (-3.1 to -2.1)* | 0.6 (-0.6 to 1.9)    |
|                            | White women      | 27.9   | 26.1   | 37.1                                | -0.5 (-1.1 to 0.1)   | 5.3 (3.1 to 7.5)*    |
|                            | Black men        | 124.0  | 107.5  | 133.9                               | -0.4 (-1.0 to 0.2)   | 1.7 (0.2 to 3.2)*    |
|                            | White men        | 30.3   | 33.8   | 52.7                                | 1.0 (-0.1 to 2.2)    | 6.2 (5.6 to 6.9)*    |
| Valvular Heart Disease     | Total            | 28.8   | 23.3   | 20.1                                | -1.6 (-1.8 to -1.4)* | -1.6 (-1.8 to -1.4)* |
|                            | Black women      | 21.5   | 16.1   | 15.4                                | -2.3 (-2.7 to -2.0)* | -2.3 (-2.7 to -2.0)* |
|                            | White women      | 27.6   | 23.1   | 19.2                                | -1.5 (-1.7 to -1.3)* | -2.6 (-3.7 to -1.5)* |
|                            | Black men        | 24.0   | 16.4   | 15.7                                | -1.6 (-2.3 to -0.9)* | -1.6 (-2.3 to -0.9)* |
|                            | White men        | 32.5   | 26.8   | 23.4                                | -1.2 (-1.5 to -0.9)* | -1.2 (-1.5 to -0.9)* |
| Arrhythmia                 | Total            | 27.2   | 30.7   | 33.5                                | 1.0 (-1.3 to 3.4)    | 1.9 (1.4 to 2.4)*    |
|                            | Black women      | 27.3   | 25.9   | 29.6                                | -0.2 (-0.7 to 0.3)   | -0.2 (-0.7 to 0.3)   |
|                            | White women      | 24.2   | 29.7   | 30.5                                | 1.3 (1.0 to 1.6)*    | 1.3 (1.0 to 1.6)*    |
|                            | Black men        | 39.2   | 33.9   | 40.8                                | 0.2 (-0.4 to 0.9)    | 0.2 (-0.4 to 0.9)    |
|                            | White men        | 31.0   | 34.1   | 39.1                                | 0.9 (-0.2 to 2.0)    | 1.8 (0.3 to 3.4)*    |
| Pulmonary Heart Disease    | Total            | 20.9   | 17.4   | 18.3                                | -1.3 (-2.7 to 0.1)   | 1.0 (0.5 to 1.6)*    |
|                            | Black women      | 36.2   | 27.7   | 33.9                                | -1.8 (-2.5 to -1.0)* | 2.1 (0.6 to 3.6)*    |
|                            | White women      | 20     | 17.7   | 18.1                                | -0.7 (-2.3 to 0.9)   | 0.6 (0.2 to 1.0)*    |
|                            | Black men        | 38.2   | 27.2   | 31.7                                | -2.2 (-3.6 to -0.8)* | 1.6 (-0.2 to 3.4)    |
|                            | White men        | 19.8   | 15.8   | 16.4                                | -2.3 (-3.2 to -1.4)* | 1.5 (0.3 to 2.6)*    |
| Other Heart Disease        | Total            | 97.2   | 69.8   | 65.6                                | -2.6 (-2.9 to -2.2)* | -1.1 (-1.4 to -0.8)* |
|                            | Black women      | 120.5  | 87.5   | 85.8                                | -2.5 (-3.1 to -2.0)* | -0.6 (-1.8 to 0.6)   |
|                            | White women      | 74.9   | 53     | 48.4                                | -2.7 (-3.2 to -2.2)* | -1.2 (-1.6 to -0.8)* |
|                            | Black men        | 196.5  | 147.5  | 149.6                               | -2.5 (-3.7 to -1.3)* | 0.2 (-1.2 to 1.7)    |
|                            | White men        | 118.4  | 84.5   | 79.1                                | -2.6 (-3.0 to -2.2)* | -1.1 (-1.5 to -0.8)* |

CI: Confidence interval. AAMR: Age-adjusted mortality rate per 100,000 population. Mean annual percentage change shown for AAMR for the specified time range. \*Indicates that the mean annual percent change is significantly different from zero, p<0.05.

**Supplementary Table G. Years of potential life lost from total heart disease (using average US life expectancy as the referent) in the overall US population and in race-sex subgroups, 1999-2018.**

|                            | Race-Sex Group     | Years of Potential Life Lost (per 100,000 population) |        |        | Mean Annual Percent Change (95% CI) |                      |
|----------------------------|--------------------|-------------------------------------------------------|--------|--------|-------------------------------------|----------------------|
|                            |                    | 1999                                                  | 2011   | 2018   | 1999-2011                           | 2011-2018            |
| <b>Total Heart Disease</b> | <b>Overall</b>     | 1493.5                                                | 1079.7 | 1068.1 | -2.7 (-2.9 to -2.6)*                | 0.1 (-0.2 to 0.4)    |
|                            | <b>Black women</b> | 1959.5                                                | 1298.2 | 1291.5 | -3.6 (-3.9 to -3.3)*                | -0.1 (-0.7 to 0.5)   |
|                            | <b>White women</b> | 817.1                                                 | 598.0  | 595.3  | -2.6 (-2.7 to -2.4)*                | 0.2 (-0.2 to 0.6)    |
|                            | <b>Black men</b>   | 3607.7                                                | 2476.9 | 2507.9 | -2.9 (-3.4 to -2.5)*                | 0.2 (-0.9 to 1.3)    |
|                            | <b>White men</b>   | 1969.3                                                | 1429.1 | 1387.1 | -2.6 (-2.8 to -2.5)*                | -0.4 (-0.7 to -0.2)* |

CI: Confidence interval. Mean annual percentage change shown for years of potential life lost for the specified time range. \*Indicates that the mean annual percent change is significantly different from zero,  $p < 0.05$ .



**Supplementary Table H. Years of potential life lost from total heart disease (using age 85 as the referent) in the overall US population and in race-sex subgroups, 1999-2018.**

|                            | Race-Sex Group     | Years of Potential Life Lost<br>(per 100,000 population) |        |        | Mean Annual<br>Percent Change (95% CI) |                      |
|----------------------------|--------------------|----------------------------------------------------------|--------|--------|----------------------------------------|----------------------|
|                            |                    | 1999                                                     | 2011   | 2018   | 1999-2011                              | 2011-2018            |
| <b>Total Heart Disease</b> | <b>Overall</b>     | 2512.0                                                   | 1731.0 | 1694.8 | -3.1 (-3.2 to -2.9)*                   | -0.4 (-0.6 to -0.1)* |
|                            | <b>Black women</b> | 3179.9                                                   | 2030.5 | 1988.9 | -3.7 (-4.5 to -2.9)*                   | -0.3 (-0.7 to 0.1)   |
|                            | <b>White women</b> | 1495.8                                                   | 1025.1 | 995.7  | -3.1 (-3.3 to -3.0)*                   | -0.2 (-0.5 to 0.2)   |
|                            | <b>Black men</b>   | 5597.2                                                   | 3779.2 | 3864.5 | -3.1 (-3.5 to -2.8)*                   | 0.1 (-0.3 to 0.6)    |
|                            | <b>White men</b>   | 3305.7                                                   | 2285.0 | 2211.6 | -3.0 (-3.2 to -2.9)*                   | -0.4 (-0.7 to -0.2)* |

CI: Confidence interval. Mean annual percentage change shown for years of potential life lost for the specified time range. \*Indicates that the mean annual percent change is significantly different from zero,  $p < 0.05$ .

**Supplementary Table I. Heart failure-related cardiovascular mortality trends by race, sex, and age in the US, 1999-2018**

|                 | Race-Sex Group | AAMR or YPLL per 100,000 |       |       | Mean Annual Percent Change (95% CI) |                   |
|-----------------|----------------|--------------------------|-------|-------|-------------------------------------|-------------------|
|                 |                | 1999                     | 2011  | 2018  | 1999-2011                           | 2011-2018         |
| AAMR (All Ages) | Total          | 74.6                     | 53.3  | 58.1  | -2.8 (-3.5 to -2.1)*                | 1.3 (0.6 to 1.9)* |
|                 | Black women    | 67.6                     | 48.5  | 53.3  | -2.9 (-3.7 to -2.2)*                | 1.7 (0.8 to 2.6)* |
|                 | White women    | 67.5                     | 47.3  | 50.3  | -3.0 (-4.0 to -2.1)*                | 0.9 (0.1 to 1.7)* |
|                 | Black men      | 82.1                     | 61.3  | 73.6  | -2.4 (-2.8 to -1.9)*                | 2.7 (2.2 to 3.2)* |
|                 | White men      | 86.3                     | 63.2  | 70.4  | -2.5 (-3.2 to -1.9)*                | 1.5 (1.2 to 1.9)* |
| AAMR (<45)      | Total          | 0.8                      | 0.9   | 1.2   | 0.0 (-1.4 to 1.4)                   | 4.9 (3.1 to 6.7)* |
|                 | Black women    | 1.9                      | 1.7   | 2     | -0.6 (-1.2 to 0.0)*                 | 2.0 (0.9 to 3.2)* |
|                 | White women    | 0.5                      | 0.5   | 0.6   | -1.5 (-2.9 to -0.2)*                | 4.2 (1.5 to 6.9)* |
|                 | Black men      | 2.6                      | 3.1   | 4.3   | 1.1 (-1.4 to 3.7)                   | 4.8 (2.8 to 6.9)* |
|                 | White men      | 0.8                      | 0.8   | 1.1   | -0.1 (-1.9 to 1.8)                  | 4.5 (2.8 to 6.3)* |
| AAMR (45-64)    | Total          | 20.1                     | 15.1  | 20.2  | -2.5 (-2.8 to -2.3)*                | 4.3 (3.7 to 5.0)* |
|                 | Black women    | 32                       | 25.1  | 32    | -2.1 (-3.1 to -1.0)*                | 3.8 (2.7 to 4.9)* |
|                 | White women    | 12.3                     | 8.9   | 11.1  | -3.2 (-3.7 to -2.8)*                | 3.7 (2.6 to 4.8)* |
|                 | Black men      | 52.8                     | 41.4  | 58    | -1.6 (-2.5 to -0.7)*                | 4.8 (3.8 to 5.9)* |
|                 | White men      | 24.1                     | 17.6  | 23.6  | -2.7 (-3.0 to -2.5)*                | 4.5 (3.9 to 5.1)* |
| AAMR (≥65)      | Total          | 550.5                    | 390.6 | 418.4 | -2.9 (-3.6 to -2.1)*                | 1.0 (0.4 to 1.6)* |
|                 | Black women    | 468.7                    | 330.8 | 354.8 | -3.1 (-3.9 to -2.3)*                | 1.4 (0.5 to 2.3)* |
|                 | White women    | 510                      | 356.2 | 375.4 | -3.0 (-4.0 to -2.1)*                | 0.8 (0.0 to 1.6)* |
|                 | Black men      | 543.7                    | 396.4 | 458.6 | -2.6 (-3.1 to -2.1)*                | 2.2 (1.6 to 2.8)* |
|                 | White men      | 636                      | 465.3 | 509.9 | -2.6 (-3.3 to -1.8)*                | 1.3 (0.9 to 1.7)* |
| YPLL            | Total          | 203                      | 150   | 189   | -2.8 (-3.1 to -2.5)*                | 3.7 (3.3 to 4.1)* |
|                 | Black women    | 284                      | 218   | 268   | -2.3 (-3.1 to 1.6)*                 | 3.3 (2.5 to 4.1)* |
|                 | White women    | 189                      | 131   | 152   | -3.2 (-4.3 to -2.1)*                | 2.3 (1.4 to 3.2)* |
|                 | Black men      | 257                      | 226   | 312   | -1.0 (-1.8 to -0.2)*                | 4.8 (3.9 to 5.7)* |
|                 | White men      | 195                      | 140   | 178   | -2.9 (-3.1 to -2.7)*                | 3.9 (3.4 to 4.3)* |

CI: Confidence interval. AAMR: Age-adjusted mortality rate per 100,000 population. YPLL: Years of potential life lost per 100,000 population. Mean annual percentage change shown for AAMR or YPLL for the specified time range. \*Indicates that the mean annual percent change is significantly different from zero,  $p < 0.05$ .

**Supplementary Table J. Summary of complementary mortality statistics (total number, relative proportion, age-adjusted mortality rate, and years of potential life lost) for total and cause-specific heart disease deaths in the US for 2018**

|                                   | <b>Number of decedents</b> | <b>Percent of Total Heart Disease deaths</b> | <b>AAMR per 100,000 (95% CI)</b> | <b>YPLL per 100,000</b> |
|-----------------------------------|----------------------------|----------------------------------------------|----------------------------------|-------------------------|
| <b>Total Heart Disease</b>        | 655381                     | 100%                                         | 163.6 (163.2 to 164.0)           | 1068                    |
| <b>Ischemic Heart Disease</b>     | 365744                     | 55.8%                                        | 90.9 (90.6 to 91.2)              | 578                     |
| <b>Heart Failure</b>              | 83616                      | 12.8%                                        | 20.8 (20.7 to 20.9)              | 64                      |
| <b>Hypertensive Heart Disease</b> | 60041                      | 9.2%                                         | 15.1 (15.0 to 15.2)              | 132                     |
| <b>Valvular Heart Disease</b>     | 24337                      | 3.7%                                         | 6.1 (6.0 to 6.2)                 | 293*                    |
| <b>Arrhythmia</b>                 | 36417                      | 5.6%                                         | 9.1 (9.0 to 9.2)                 |                         |
| <b>Pulmonary Heart Disease</b>    | 18026                      | 2.8%                                         | 4.6 (4.6 to 4.7)                 |                         |
| <b>Other Heart Disease</b>        | 67200                      | 10.3%                                        | 17.1 (16.9 to 17.2)              |                         |

AAMR: Age-adjusted mortality rate per 100,000; CI: confidence interval; YPLL: years of potential life lost. Data displayed are overall (in all race, sex, age, and geography groups). \*Aggregate YPLL for “remainder heart disease subtypes.”

**Supplementary Figure A. Age-adjusted mortality rates due to total and cause-specific heart disease deaths by county-level urbanization in the US, 1999-2018**

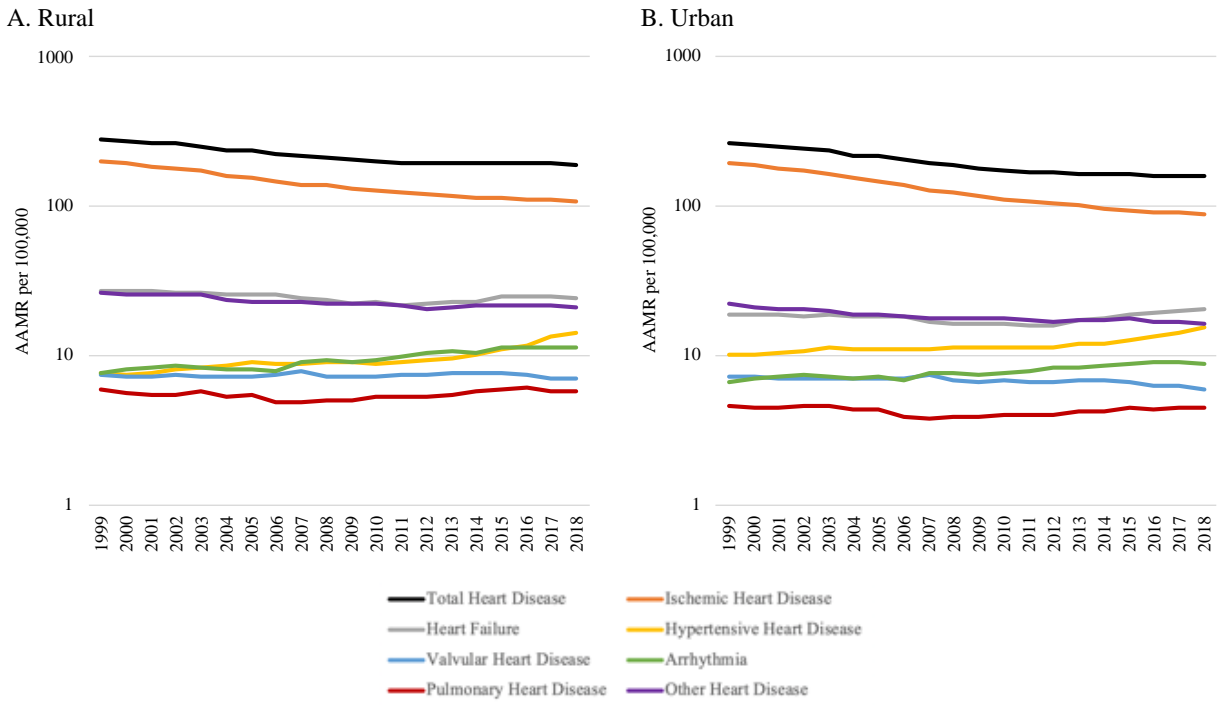

AAMR: Age-adjusted mortality rates. AAMR is displayed on a logarithmic scale.

**Supplementary Figure B. Age-adjusted mortality rates due to total and cause-specific heart disease deaths by census region in the US, 1999-2018**

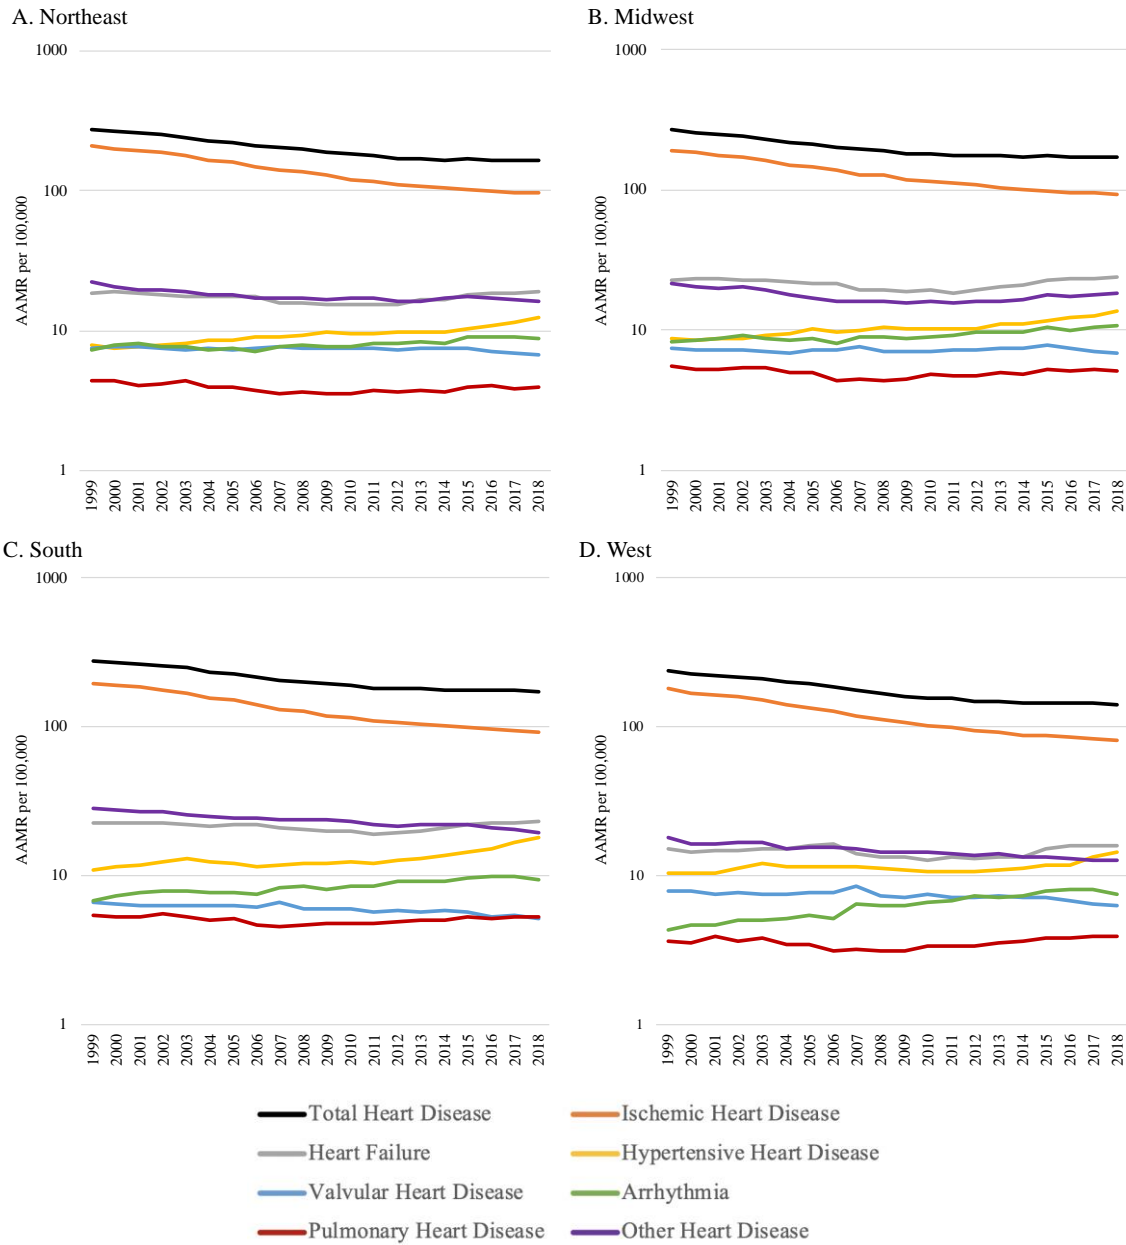

AAMR: Age-adjusted mortality rates. AAMR is displayed on a logarithmic scale. The Northeast region includes Connecticut, Maine, Massachusetts, New Hampshire, New Jersey, New York, Pennsylvania, Rhode Island, and Vermont. The Midwest region includes Illinois, Indiana, Iowa, Kansas, Michigan, Minnesota, Missouri, Nebraska, North Dakota, Ohio, South Dakota, and Wisconsin. The South region includes Alabama, Arkansas, Delaware, the District of Columbia, Florida, Georgia, Kentucky, Louisiana, Maryland, Mississippi, North Carolina, Oklahoma, South Carolina, Tennessee, Texas, Virginia, and West Virginia. The West region includes Alaska, Arizona, California, Colorado, Hawaii, Idaho, Montana, Nevada, New Mexico, Oregon, Utah, Washington, and Wyoming.

**Supplementary Figure C. Age-standardized years of potential life lost per 100,000 population attributable to total heart disease, ischemic heart disease, heart failure, and hypertensive heart disease in the total population and stratified by race-sex subgroups in the US, 1999-2018**

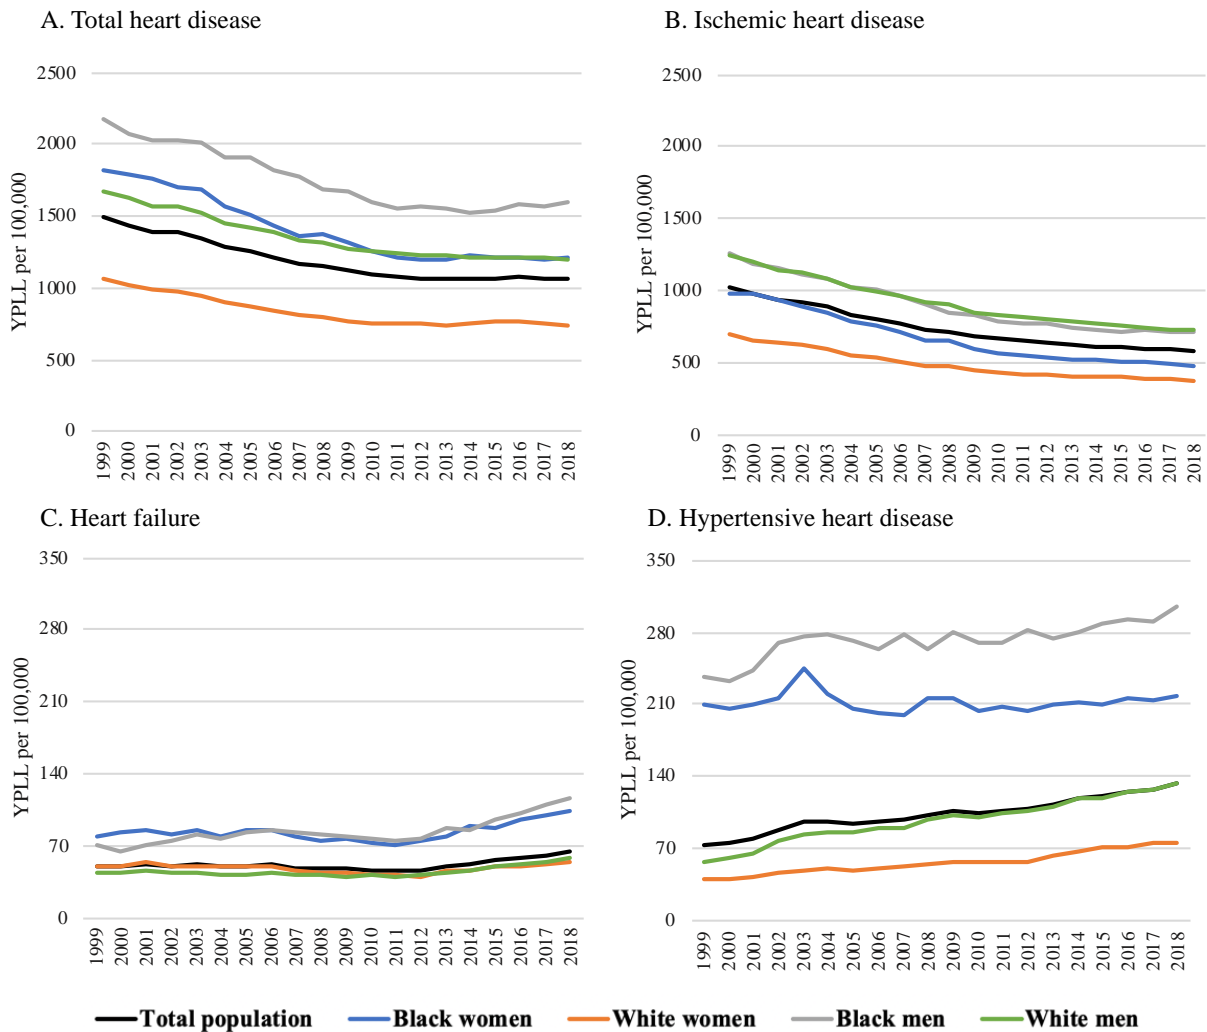

Years of potential life lost (YPLL) per 100,000 shown for (A) total heart disease, (B) ischemic heart disease, (C) heart failure, and (D) hypertensive heart disease, in black and white women and men.

Average annual percentage change of YPLL before and after 2011 are listed in Table 3.
